# Supplementary material
Source: PubMed Central journal article supplement (PMC3164485)

### Supplement 1

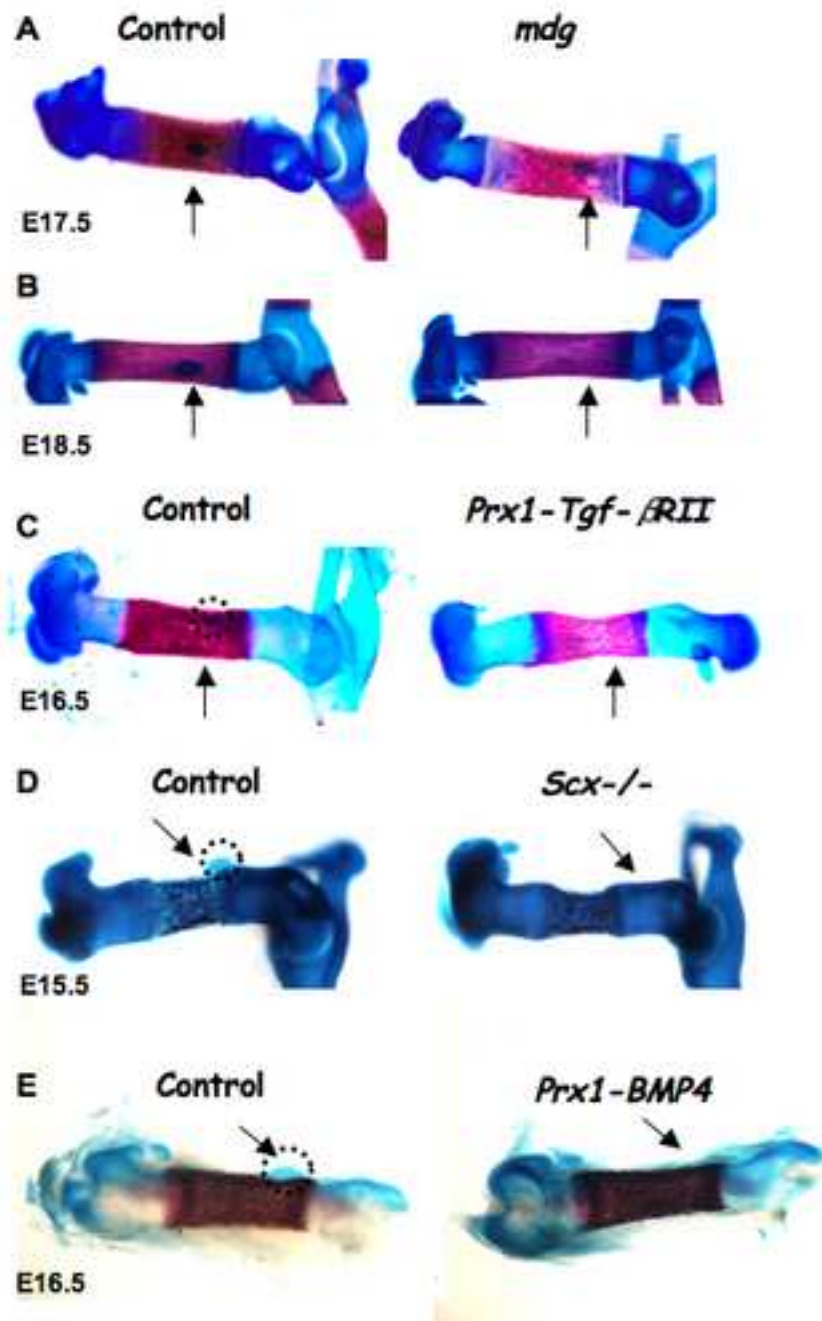

### Supplement 2

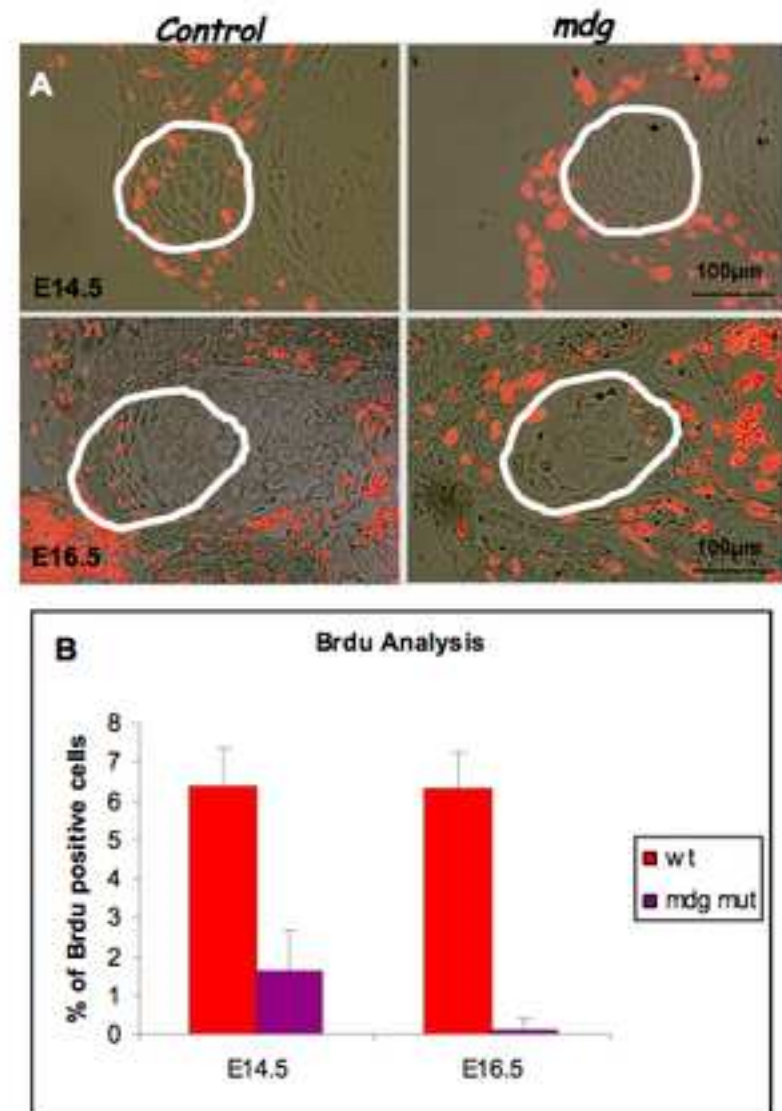



# Supplement 3

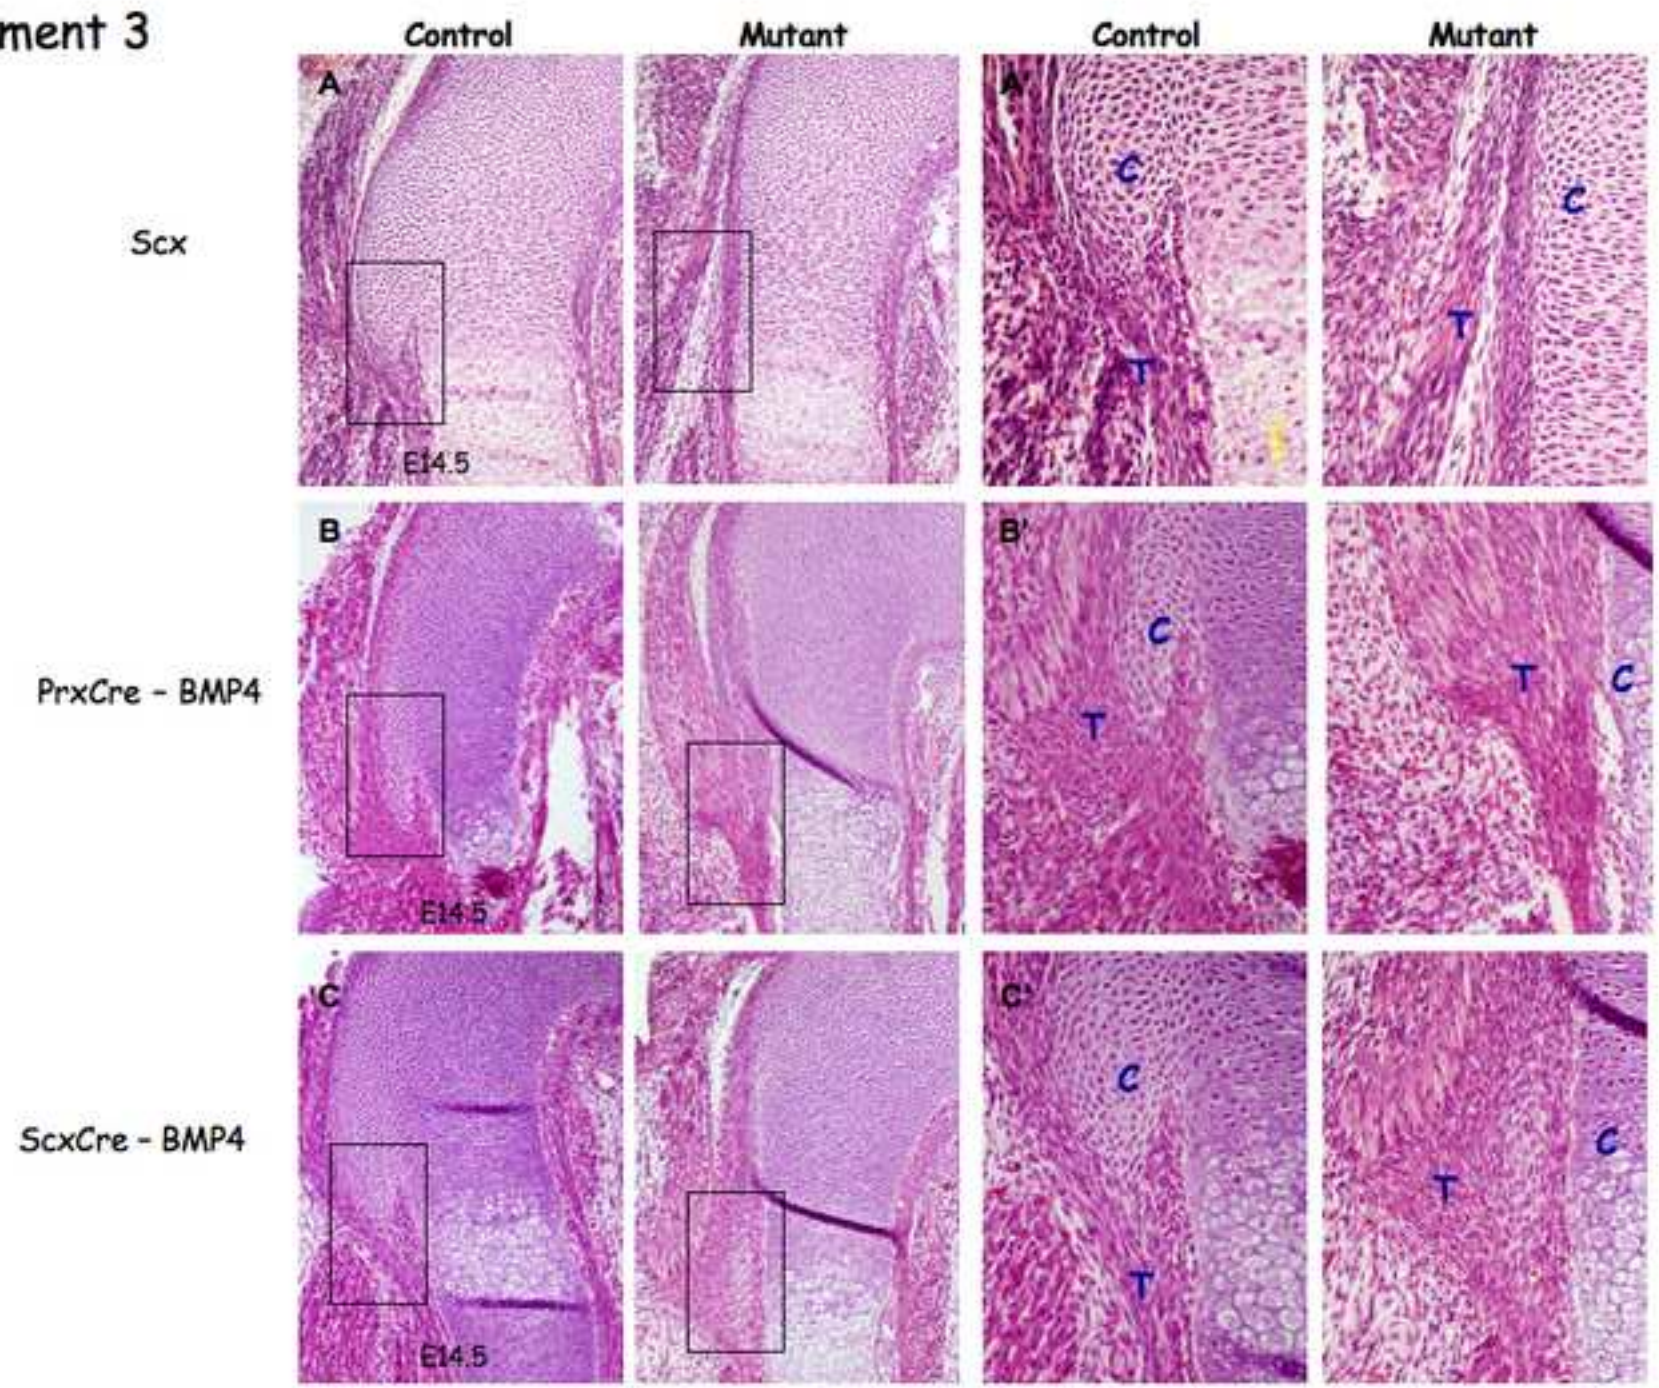

Supplement: NIHMS157405-supplement-01.pdf [file NIHMS157405-supplement-01.pdf]
